# Supplementary material
Source: publisher figshare collection journal article supplement (https://springernature.figshare.com/ndownloader/files/19072937)

**Figure S3.** Manhattan plots for sliding window analysis tests.

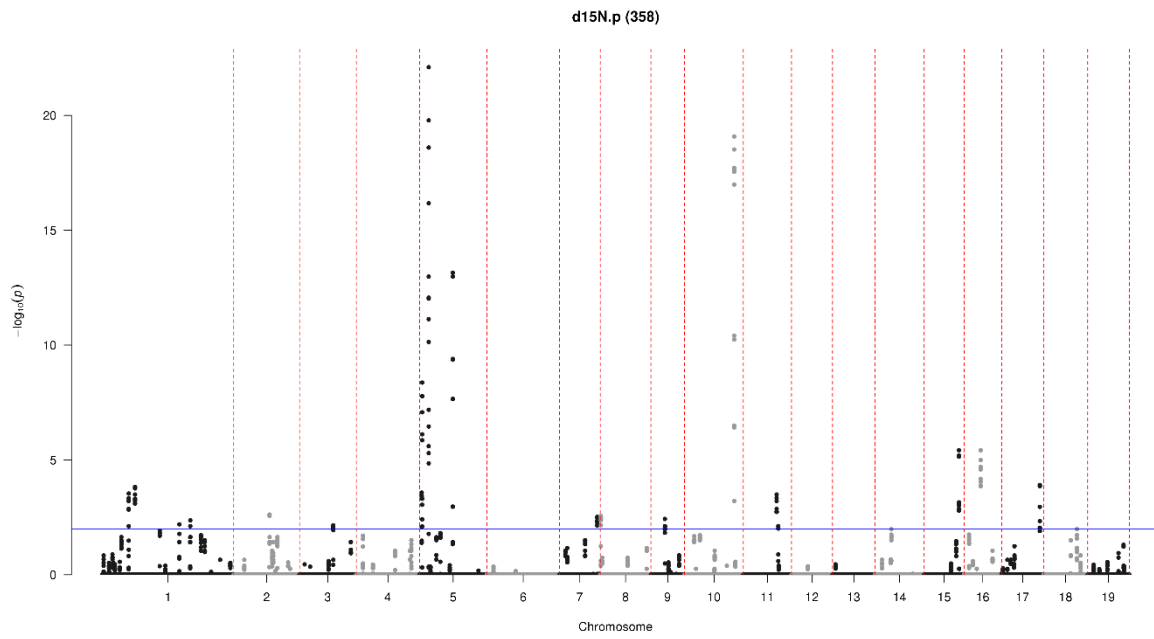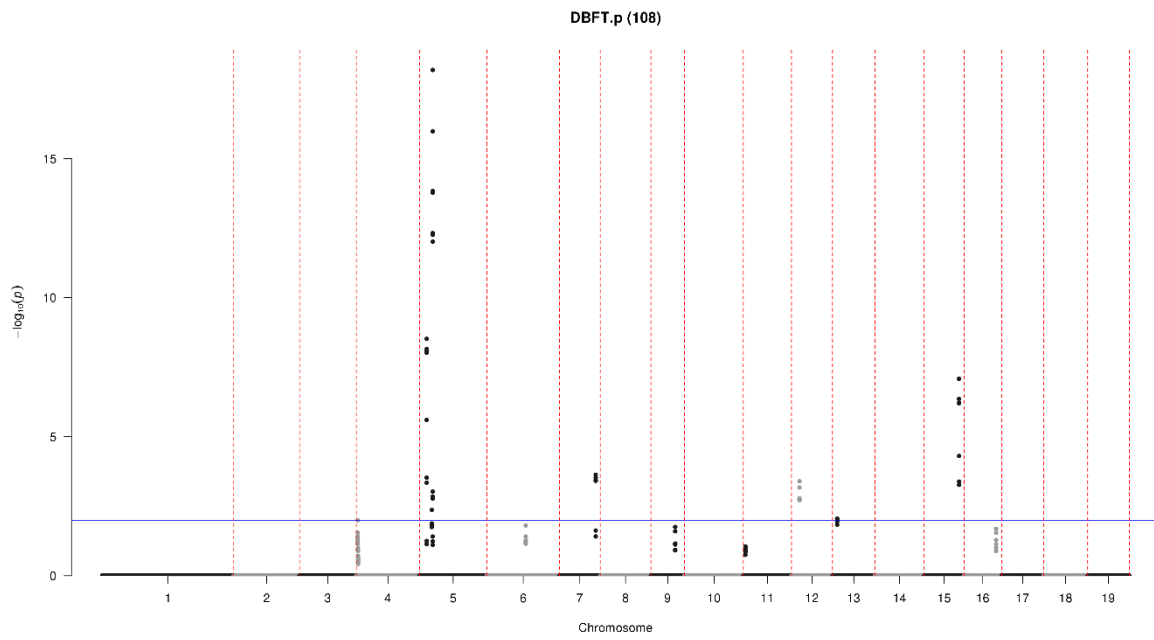

DIAM.p (58)

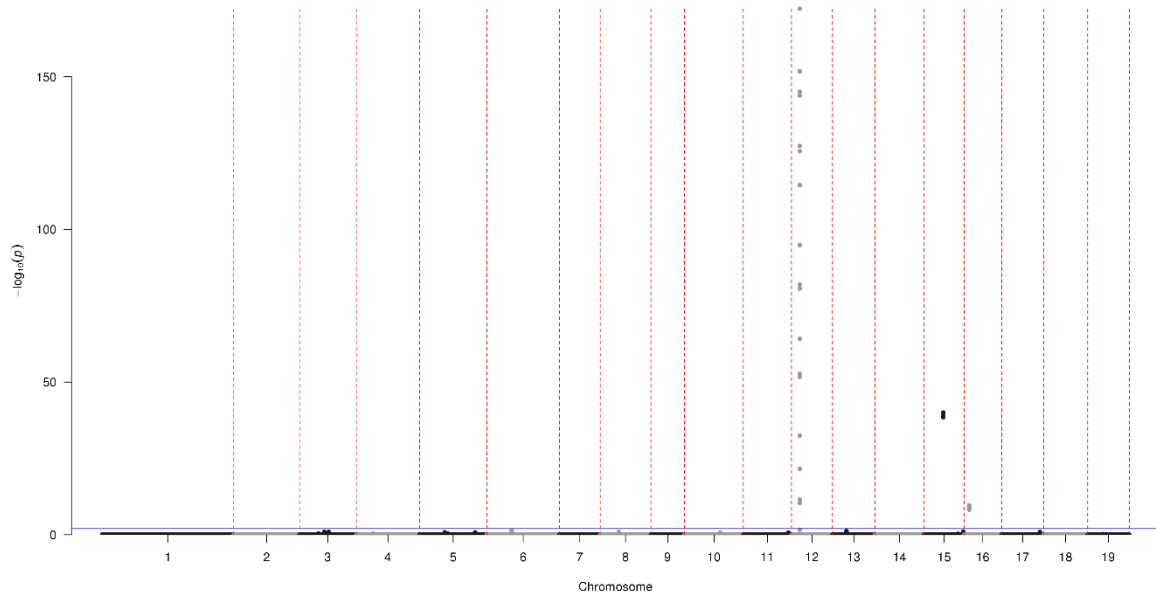

HEIGHT.p (844)

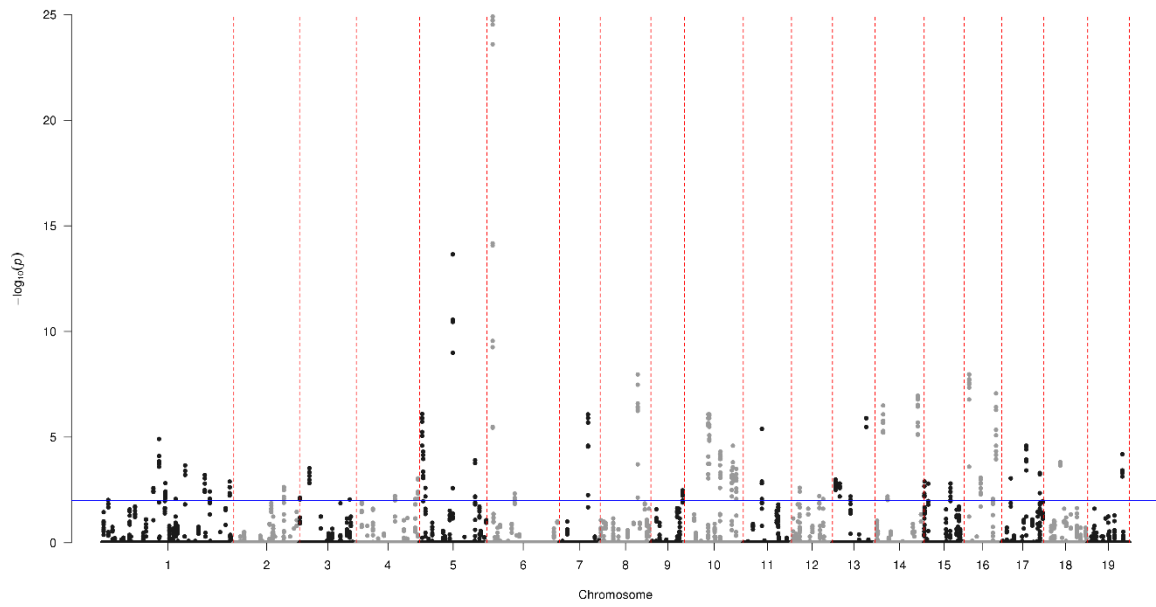

NareaT.p (108)

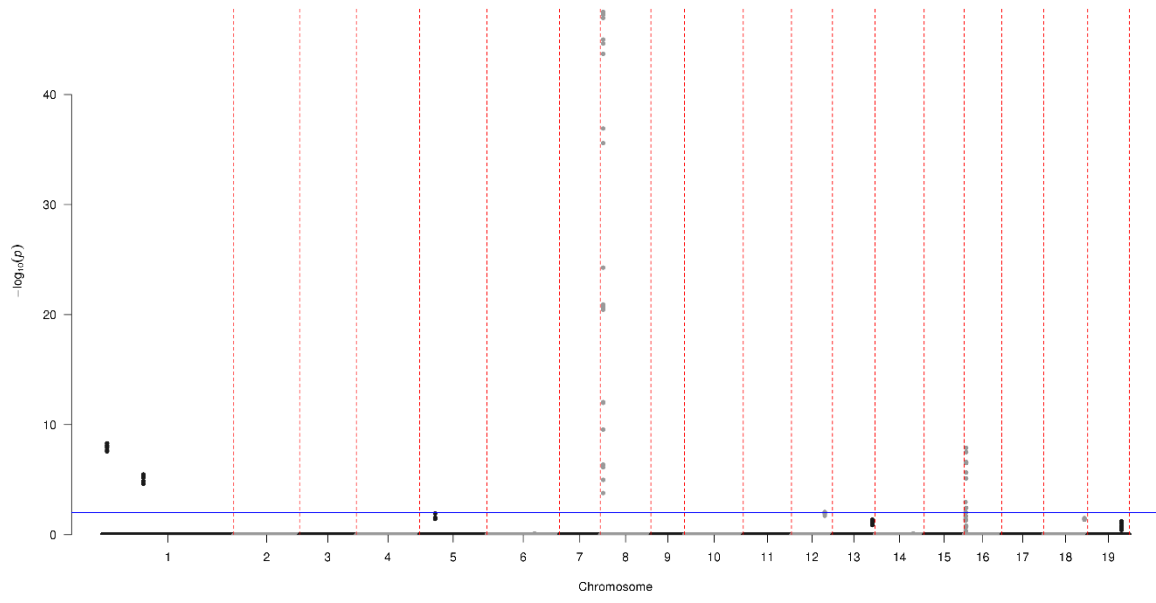

SLAT.p (105)

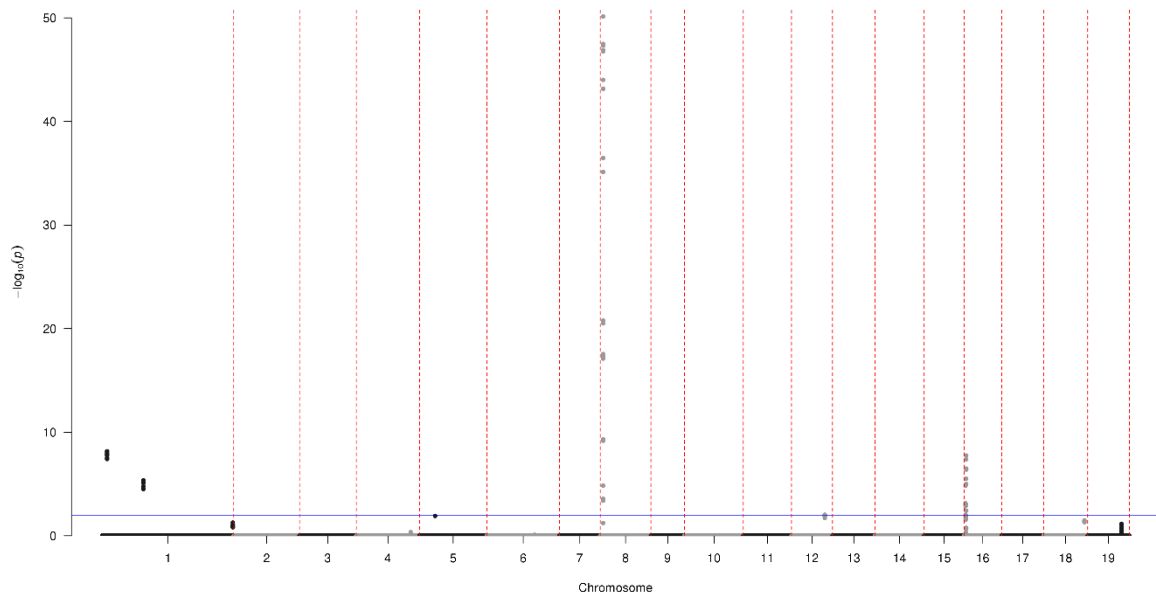

VOLT.p (70)

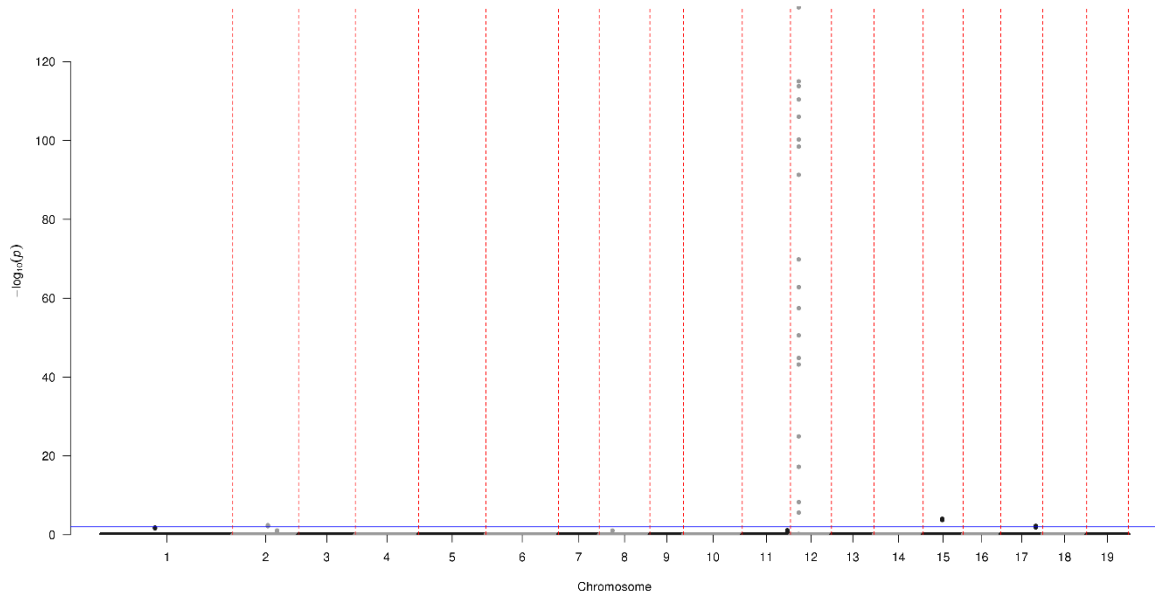

X.NT.p (1051)

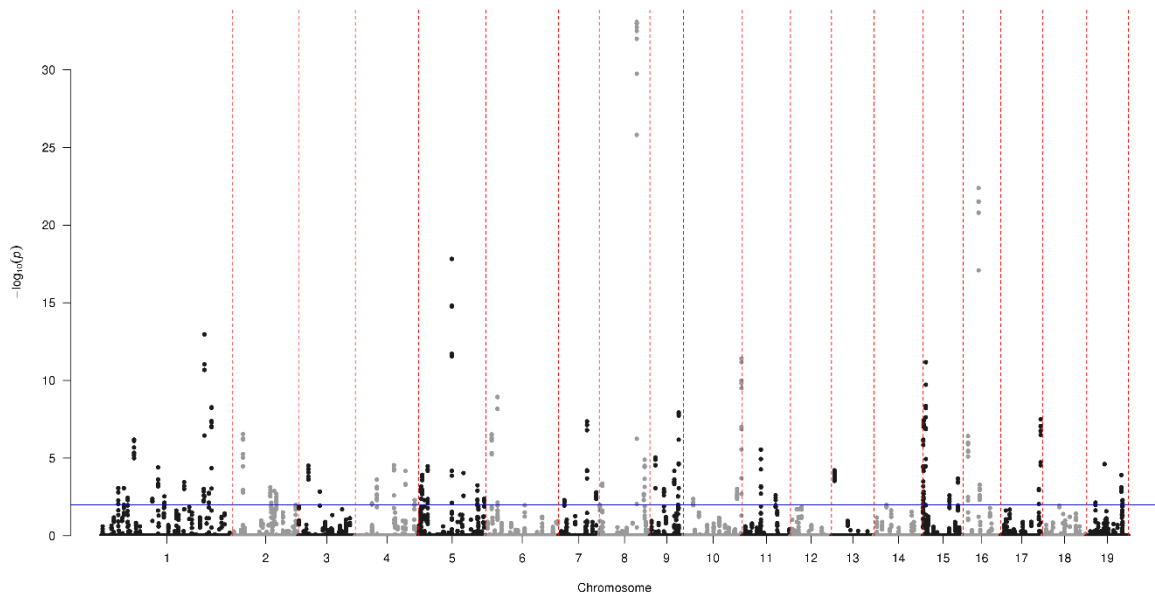

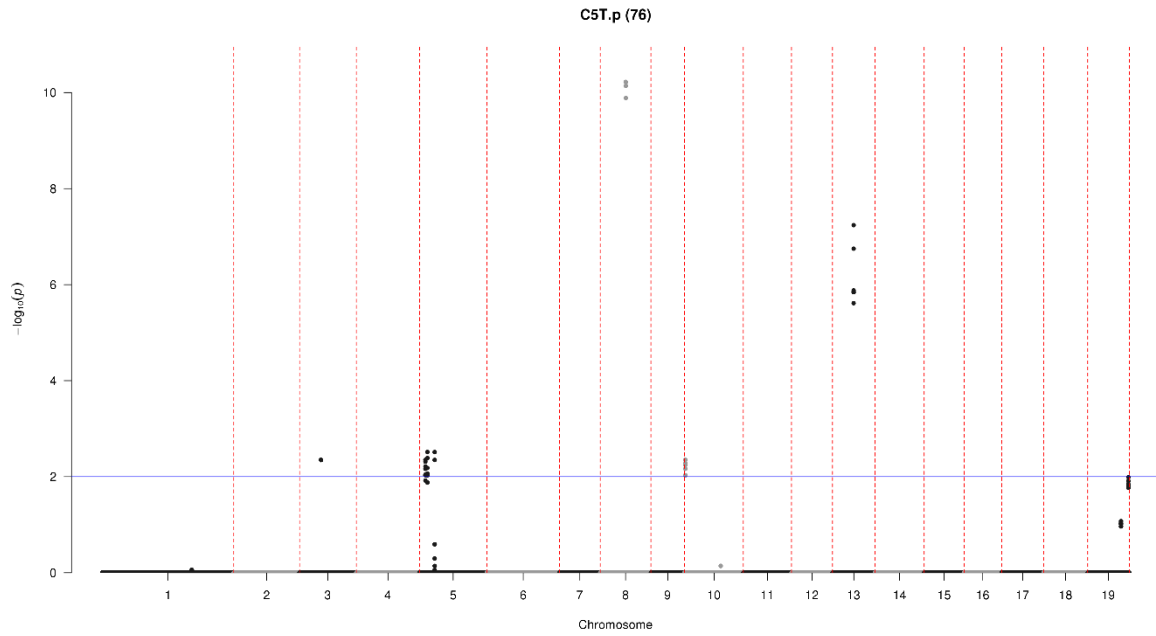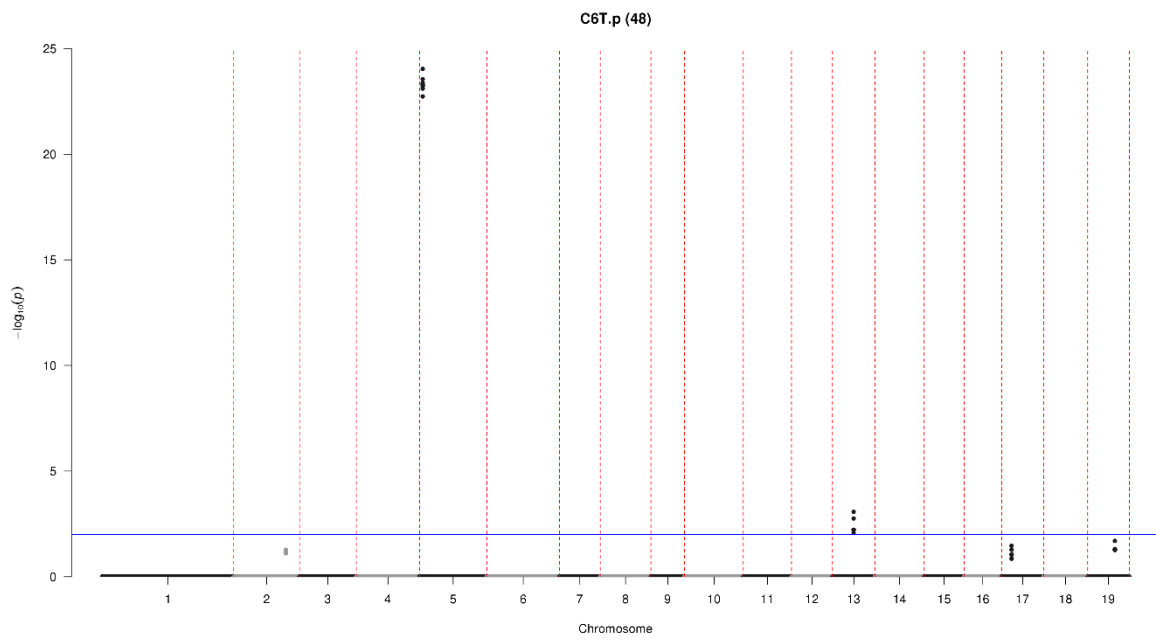

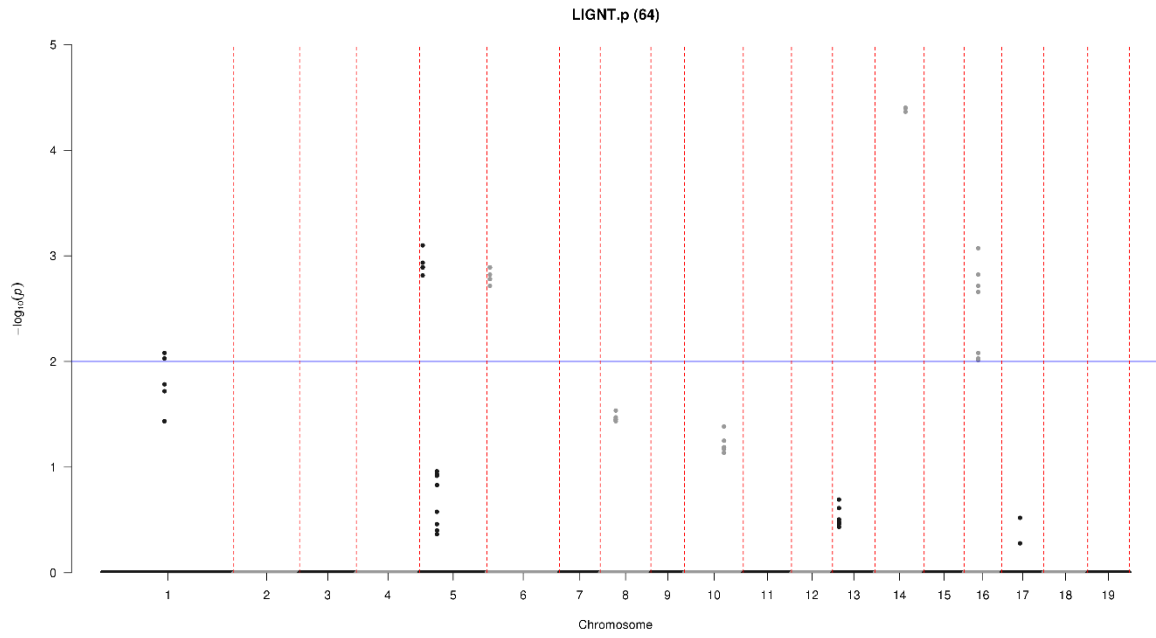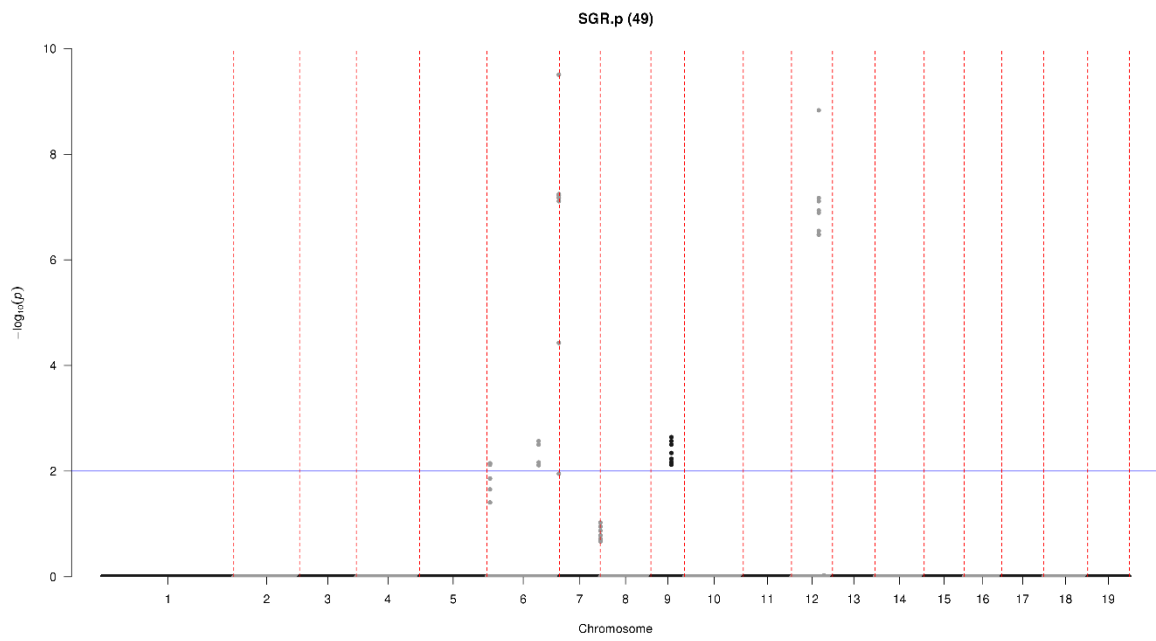

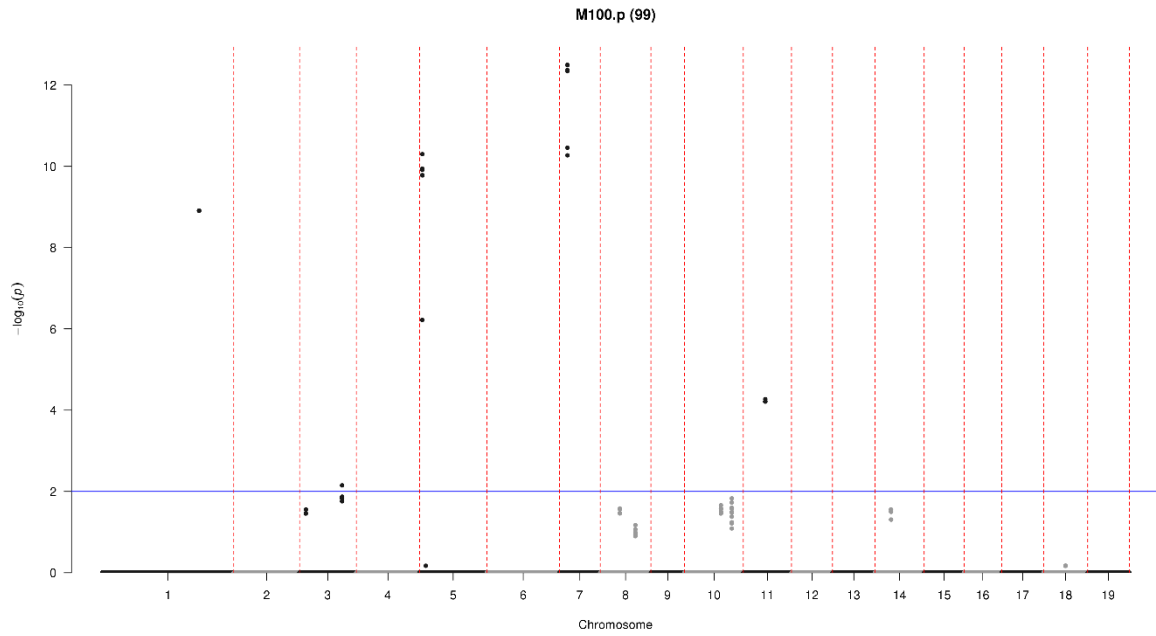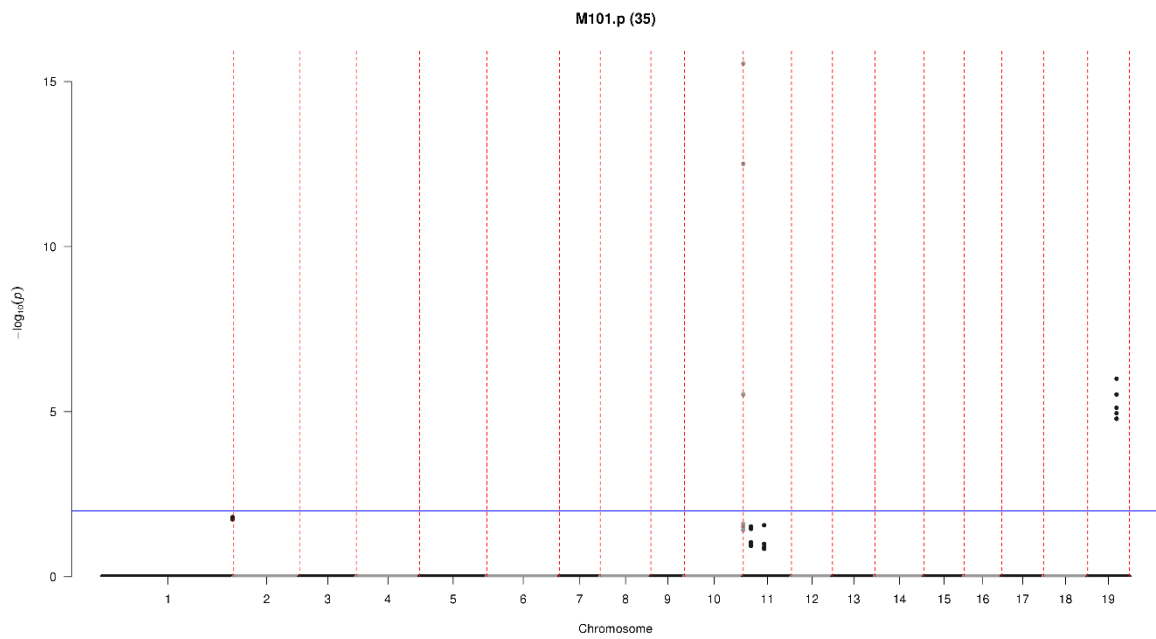

M136.p (99)

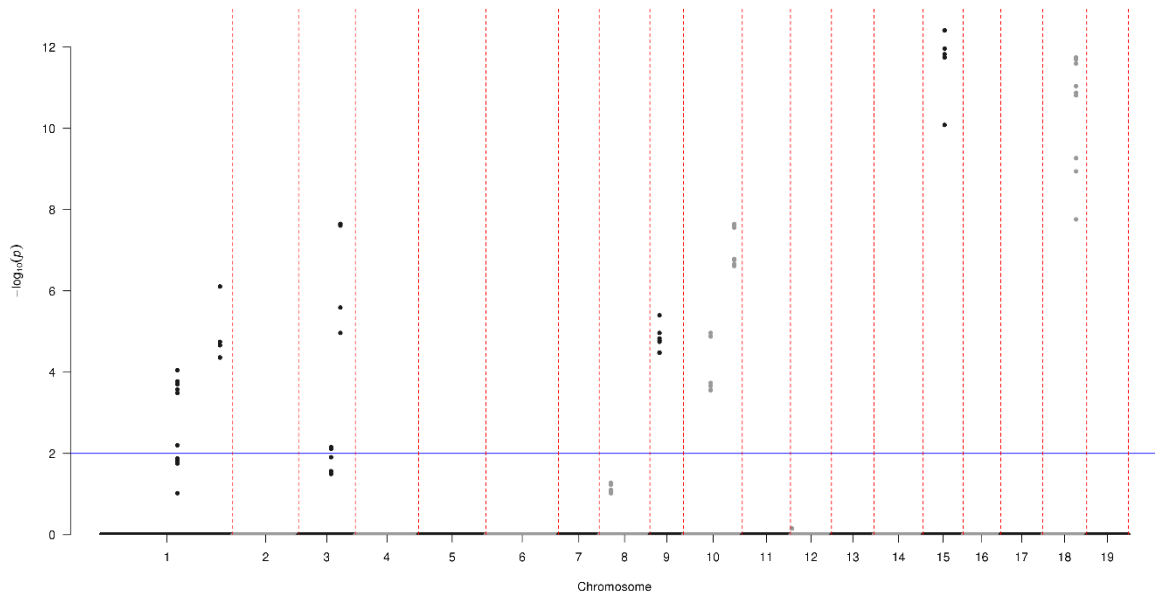

M145.p (62)

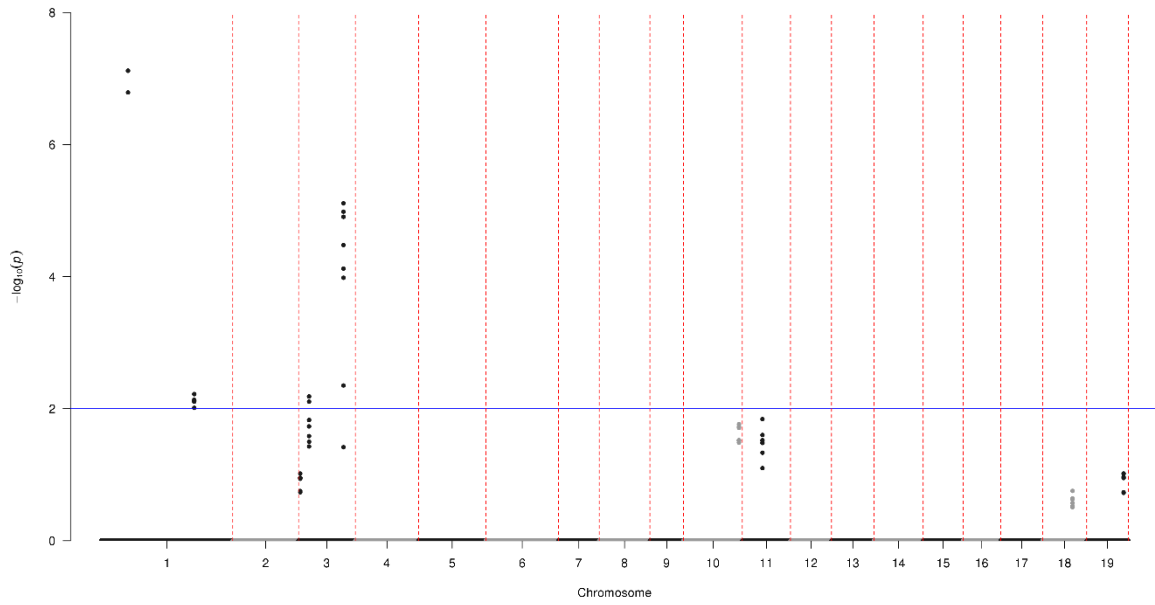



M151.p (16)

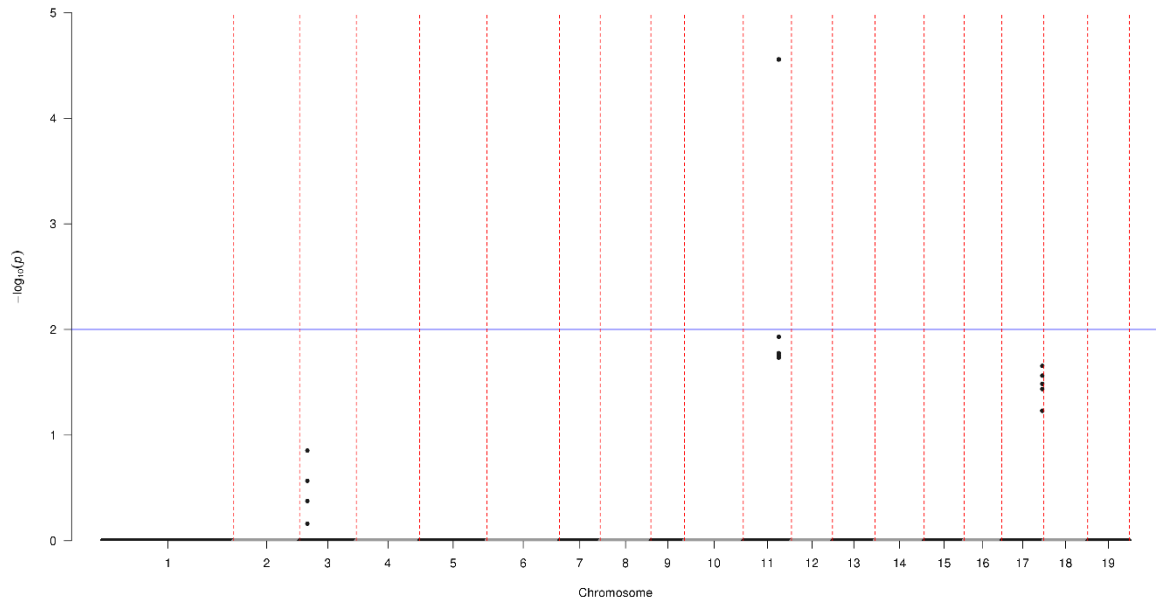

Supplement: Supplementary file [file 19072937]
